# Supplementary material
Source: publisher figshare collection journal article supplement (https://tandf.figshare.com/ndownloader/files/26790219)
Supplement: Supplementary file 1 [file 26790219]

| Supplementary Table 2. Percentage of women taking medication number during pregnancy by obesity status, NICHD Fetal GrowthStudies, Singletons (2009 -2013) | | | | | | | | |
| --- | --- | --- | --- | --- | --- | --- | --- | --- |
|  |  | **Overall** | **Enrollment** | **Visit 1** | **Visit 2** | **Visit 3** | **Visit 4** | **Visit 5** |
| **Gestational week,**  **Median (range)** | |  | 13 (10-14) | 20 (15-28) | 27 (23-32) | 32 (29-35) | 36 (33-39) | 39 (37-41) |
| **Women with obesity, No.** | | **436** | **436** | **421** | **411** | **398** | **374** | **200** |
| **Medication quantity,**  **No. (%)** | |  |  |  |  |  |  |  |
| **0** | | 102 (23) | 229 (53) | 221 (52) | 227 (55) | 226 (57) | 217 (58) | 116 (58) |
| **1** | | 103 (24) | 136 (31) | 116 (28) | 108 (26) | 95 (24) | 85 (23) | 53 (27) |
| **2** | | 87 (20) | 43 (10) | 52 (12) | 38 (9) | 40 (10) | 44 (12) | 22 (11) |
| **3** | | 58 (13) | 17 (4) | 25 (6) | 25 (6) | 20 (5) | 18 (5) | 6 (3) |
| **4** | | 29 (7) | 6 (1) | 6 (1) | 10 (2) | 8(2) | 7 (2) | 2(1) |
| **5+** | | 55 (13) | 5 (1) | 1 (0.2) | 3 (0.7) | 9 (2) | 3 (0.8) | 1 (0.5) |
| **Women without obesity, No.** | | **1750** | **1750** | **1705** | **1677** | **1655** | **1548** | **824** |
| **Medication quantity,**  **No. (%)** | |  |  |  |  |  |  |  |
| **0** | | 480 (27) | 1006 (57) | 980 (57) | 1001 (60) | 1009 (61) | 931 (60) | 522 (63) |
| **1** | | 402 (23) | 480 (27) | 459 (27) | 448 (27) | 402 (24) | 378 (24) | 198 (24) |
| **2** | | 329 (19) | 174 (10) | 182 (11) | 159 (9) | 144 (9) | 162 (10) | 65 (8) |
| **3** | | 224 (13) | 53 (3) | 53 (3) | 49 (3) | 63 (4) | 40 (3) | 28 (3) |
| **4** | | 125 (7) | 25 (1) | 21 (1) | 10 (0.6) | 26 (2) | 28 (2) | 7 (0.9) |
| **5+** | | 190 (11) | 12 (0.7) | 10 (0.6) | 10 (0.6) | 11 (0.7) | 9 (0.6) | 4 (0.5) |
